# Supplementary material
Source: PubMed Central journal article supplement (PMC4282555)
Supplement: embj0033-2765-sd1.pdf [file embj0033-2765-sd1.pdf]

**A**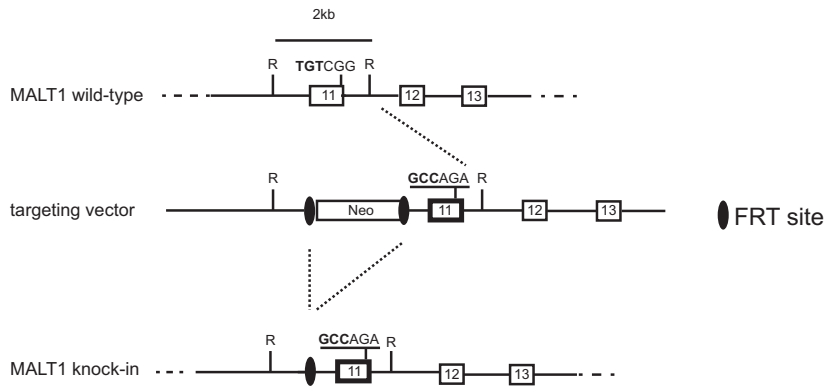**B**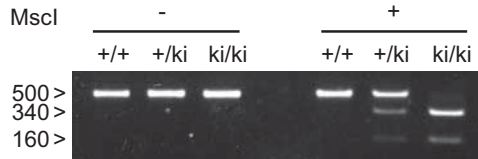**C**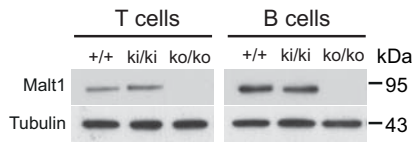

Jaworski et al., Figure S1

**A**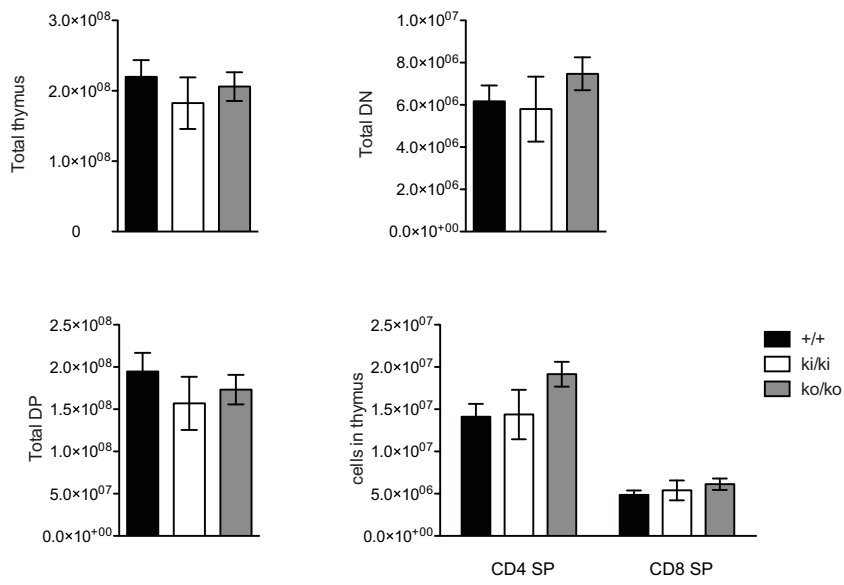**B**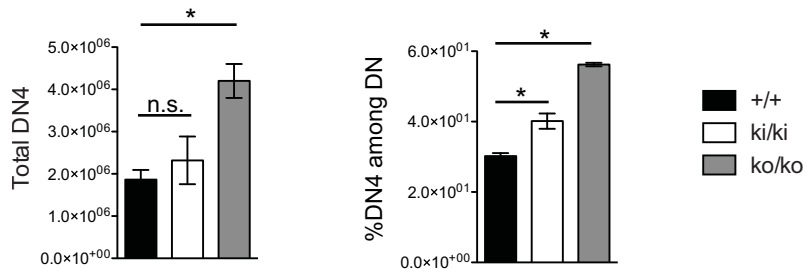**C**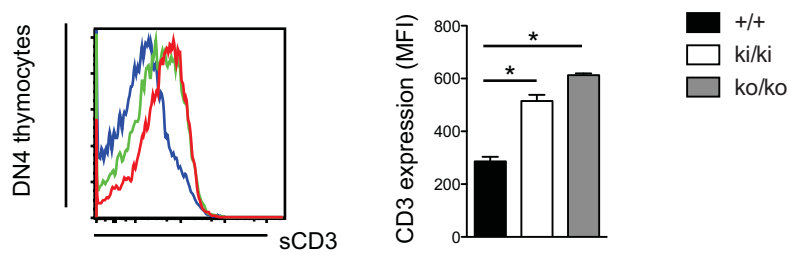**D**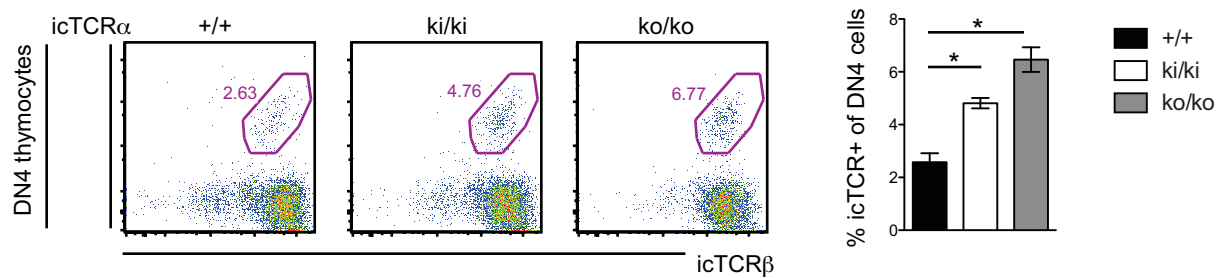

**A**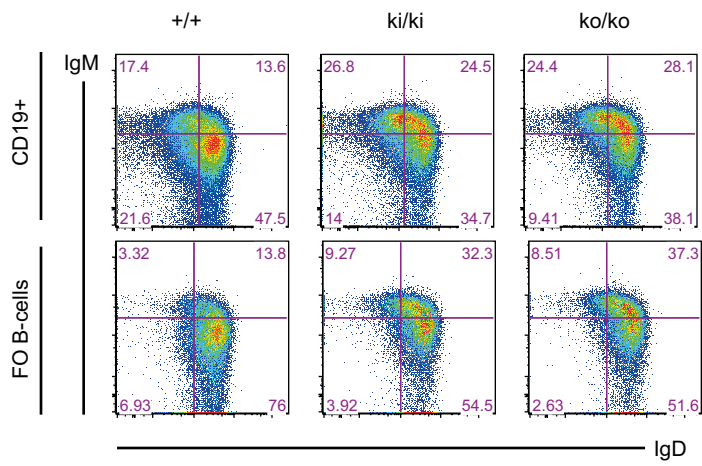**B**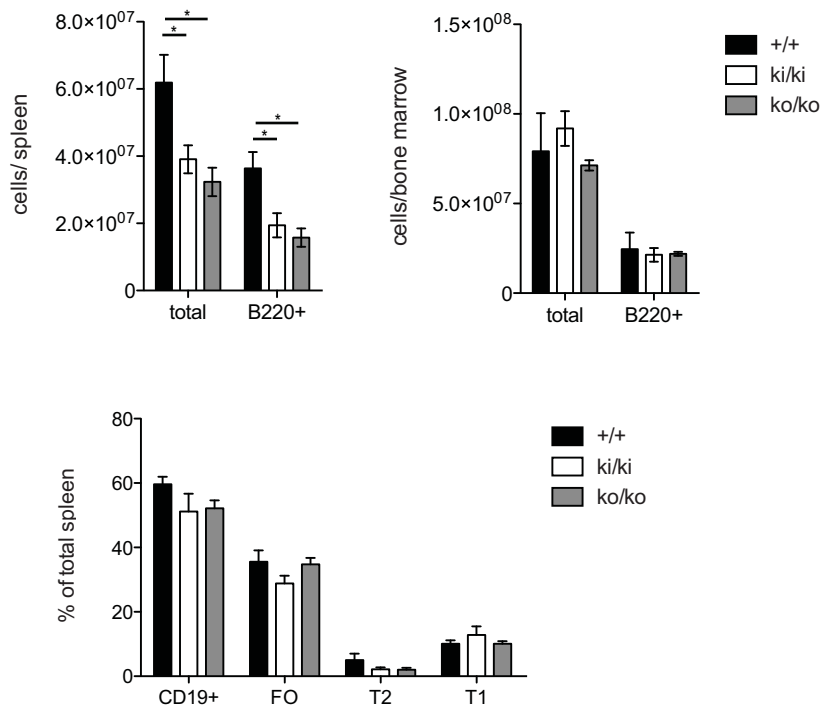

Jaworski et al., Figure S3

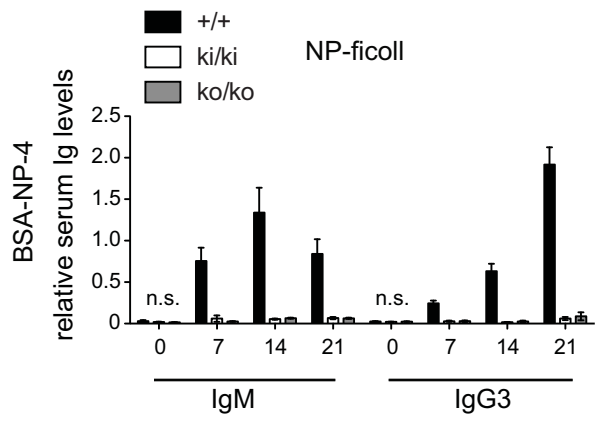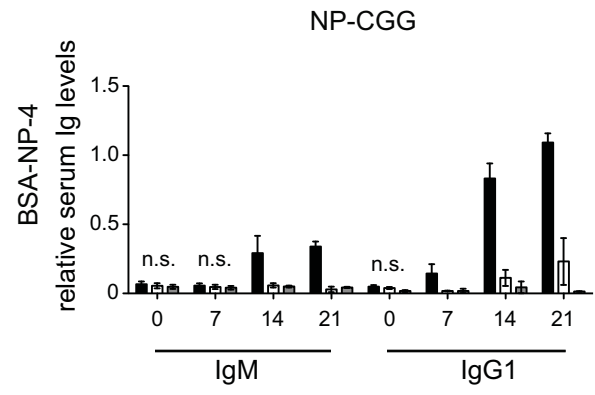

Jaworski et al., Figure S4

**A**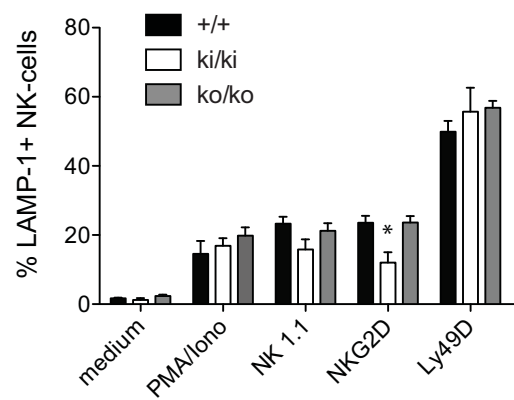**B**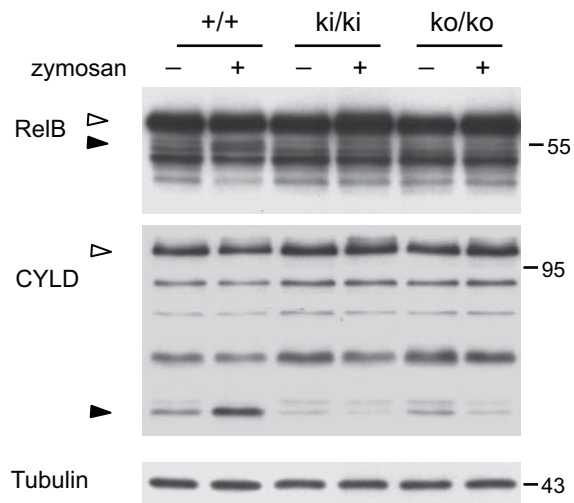

Jaworski et al., Figure S5

**A**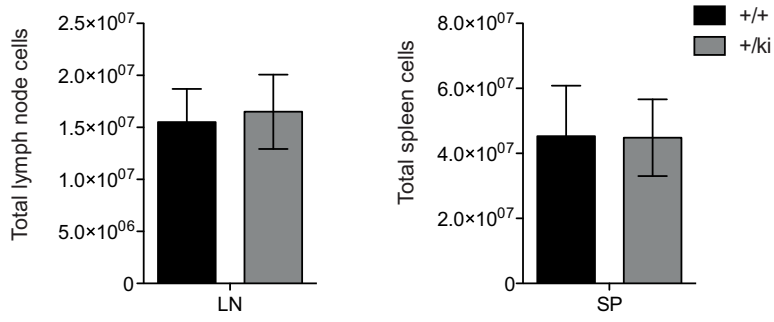**B**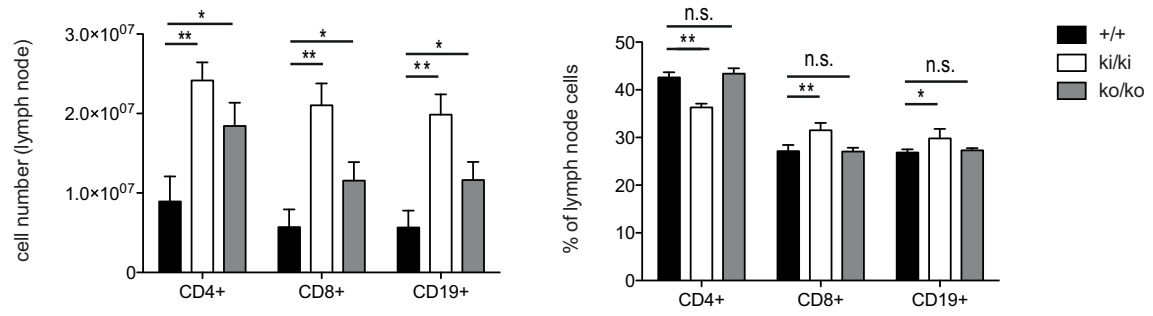**C**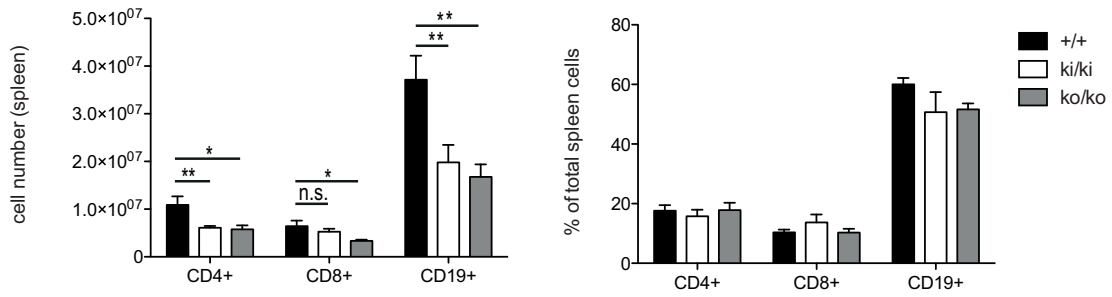

Jaworski et al., Figure S6

**A**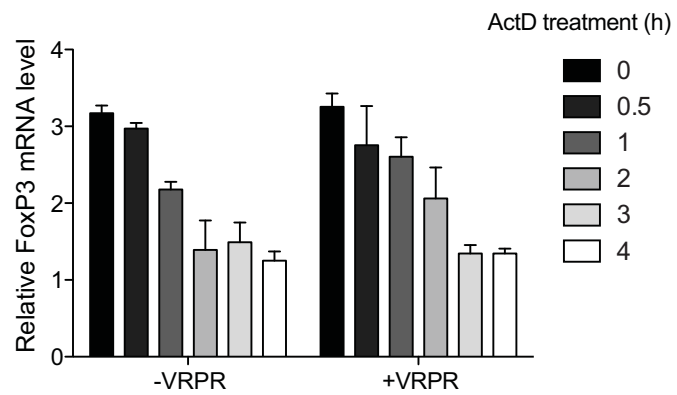**B**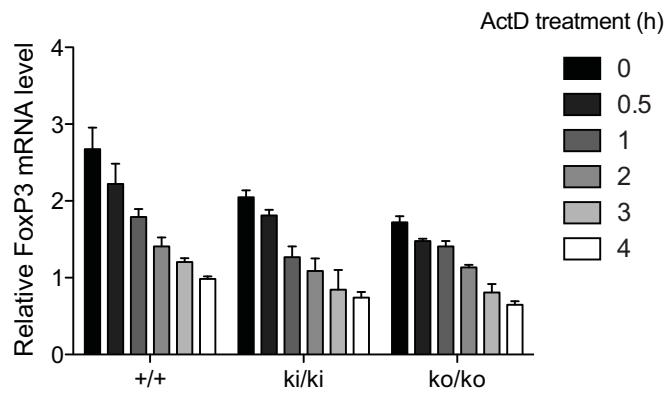

Jaworski et al., Figure S7

**A**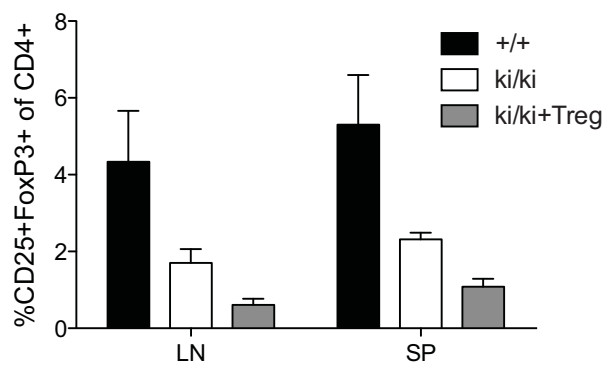**B**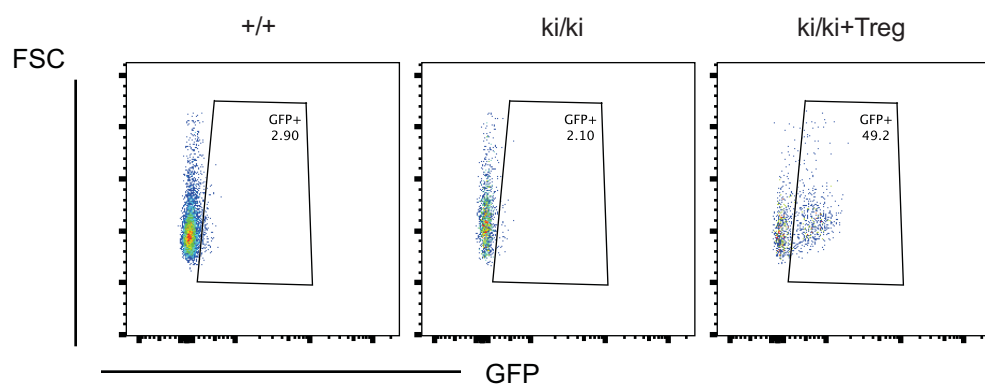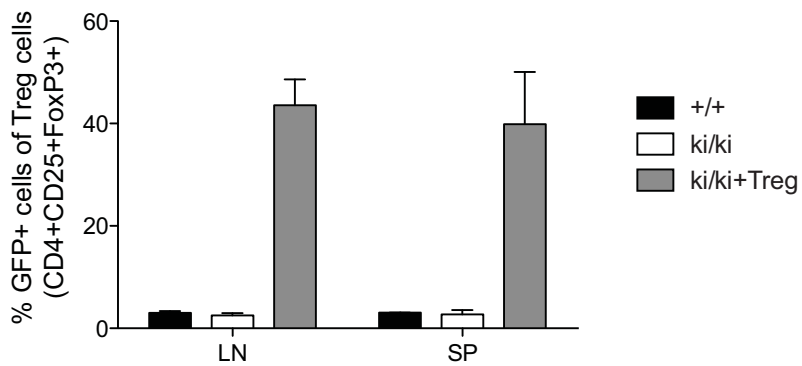

Jaworski et al., Figure S8



## Supplementary figure legends

### Figure S1. Generation of Malt1 C472A knock-in mice expressing a catalytically inactive form of Malt1.

- A The targeting vector carries a TGTCGG -> GCCAGA mutation (nucleotides 168-173 of exon 11 of the MALT1 gene) leading to a C472A mutation in the Malt1 protein, and a neomycin resistance gene (Neo) that is flanked by flippase recombinase target (FRT) sites. In the Malt1 knock-in mice used for this study, the neomycin resistance cassette was removed by crossing to mice expressing the flippase recombinase (FLP). The position of naturally occurring EcoRI sites (R) is indicated.
- B Wild-type mice (+/+), Malt1 C472A knock-in mice (ki/ki) and heterozygous littermates (+/ki) were genotyped by PCR amplification of a 500 bp fragment comprising the TGTCGG -> GCCAGA mutation of exon 11, which leads to a C472A mutation in the Malt1 protein and simultaneously generates a MscI restriction site that is absent in the wild-type gene. In the presence of the inactivating Malt1 mutation, digestion of the PCR fragment with MscI yields two fragments of 340 and 160 bp.
- C Immunoblot analysis of peripheral T cells and B cells of wild-type (+/+), Malt1 C472A knock-in (ki/ki) and Malt1-deficient (ko/ko) mice for the levels of Malt1. Immunoblotting for tubulin served as loading control. Data are representative of two independent experiments.

### Figure S2. Analysis of thymocyte subpopulations in Malt1 knock-in mice

- A Analysis of the total number of thymocytes, double negative CD4<sup>-</sup>CD8<sup>-</sup> (DN), double positive CD4<sup>+</sup>CD8<sup>+</sup> (DP), and of CD4<sup>+</sup> or CD8<sup>+</sup> single positive (SP) thymocytes in 6 week-old wild-type (+/+), Malt1 C472A knock-in (ki/ki) and Malt1-deficient (ko/ko) mice. Thymocytes were stained with a lineage mix containing antibodies against B220,  $\gamma\delta$ TCR, NK1.1, CD11b and Ter119, and further subdivided by staining against CD4 and CD8. One representative experiment out of four performed is shown with  $n \geq 3$  for each genotype.
- B-D Flow cytometric analysis of thymocytes of 6 week-old wild-type (+/+), Malt1 C472A knock-in (ki/ki) and Malt1-deficient (ko/ko) mice ( $n \geq 3$ ) for the total number and percentage of CD4<sup>-</sup>CD8<sup>-</sup> double negative (DN) cells with a CD25<sup>-</sup>CD44<sup>-</sup> phenotype (DN4) (B), the levels of surface CD3 expression on DN4 thymocytes (C), and the levels of intracellular TCR $\alpha$  and TCR $\beta$  chains (icTCR $\alpha$  and icTCR $\beta$ , respectively) (D). One representative experiment out of four performed is shown. \* $P < 0.0002$ , unpaired t-test.

**Figure S3. Analysis of splenic B-cell subsets in Malt1 knock-in mice.**

- A Flow cytometric analysis of the expression of surface IgM and IgD on CD19<sup>+</sup> and CD19<sup>+</sup>CD24<sup>lo</sup>CD23<sup>hi</sup>CD21<sup>lo</sup> follicular (FO) splenic B cells.
- B Analysis of the numbers of total and B220<sup>+</sup> bone marrow and spleen cells, and of the percentage of CD19<sup>+</sup>, follicular (FO), CD19<sup>+</sup>CD24<sup>hi</sup>CD21<sup>hi</sup>CD23<sup>hi</sup> (T2) and CD19<sup>+</sup>CD24<sup>hi</sup>CD21<sup>lo</sup> (T1) B cells in wild-type (+/+), Malt1 C472A knock-in (ki/ki) and Malt1-deficient (ko/ko) mice ( $n \geq 3$ ). One representative experiment out of six performed is shown. \* $P < 0.005$ , unpaired t-test.

**Figure S4. Analysis of immunization-induced immunoglobulin (Ig) levels.**

Analysis of total immunization-induced immunoglobulin (Ig) levels in the serum of wild-type (+/+), knock-in (ki/ki) or knock-out (ko/ko) mice (n = 8; 8 weeks old). Immunizations were performed using i.p. injection of nitrophenyl (NP)-Ficoll (d), and serum was analyzed for the presence of high affinity antibodies using BSA-NP-4. Bars represent means  $\pm$  SD and differences were statistically significant with  $P < 0.01$  (unpaired t-test), unless indicated otherwise (n.s., not significant).

**Figure S5. Stimulation-induced LAMP-1 upregulation by NK cells.**

- A Analysis of the percentage of NK cells producing LAMP-1 following stimulation with PMA and ionomycin (PMA+Iono) or agonistic antibodies directed against NKG2D, NK1.1 or Ly49D. Bars represent mean  $\pm$  SD, \* $P < 0.05$  (unpaired t-test). Data are representative of two experiments (n=4).
- B Immunoblot analysis of BMDCs stimulated with or without zymosan (100  $\mu$ g/ml) for 90 min for the cleavage of the Malt1 substrates RelB and CYLD. Immunoblotting for tubulin served as a loading control. Data are representative of two experiments.

**Figure S6. Analysis of lymphocyte subsets of lymph nodes and spleens of Malt1**

**C472A knock-in mice**

- A Analysis of the lymph nodes and spleens of Malt1-proficient (+/+) and heterozygous littermates carrying one Malt1 knock-in allele (+/ki) (n $\geq$ 3; 8 weeks old). Total numbers of lymph node and spleen cells are shown. One representative experiment out of three performed is shown.

- B Flow cytometric analysis of the total numbers and percentages of CD4<sup>+</sup>, CD8<sup>+</sup> and CD19<sup>+</sup> lymphocytes in the lymph nodes (LN) (A) and spleens (B) of wild-type (+/+), C472A knock-in (ki/ki) and Malt1-deficient (ko/ko) mice (n≥3, 6 weeks old). One representative experiment out of 4 performed is shown.

Bars represent mean ± SD, \**P* < 0.05, \*\* *P* < 0.005 (unpaired t-test).

**Figure S7. Assessment of FoxP3 mRNA stability.**

- A Naïve CD4<sup>+</sup> T cells of wild-type mice were stimulated with anti-CD3 and anti-CD28 (1 µg/ml each) under polarizing conditions (mTGF-β, 5 ng/ml; hIL-2, 100 U/ml) for 96 h, treated for additional 24 h with z-VRPR-fmk, and then treated with actinomycin D for the indicated times (n=3). FoxP3 mRNA levels were analyzed by qPCR and are shown relative to SDHA levels.
- B Naïve CD4<sup>+</sup> T cells were stimulated with anti-CD3 and anti-CD28 (1 µg/ml each) under polarizing conditions (mTGF-β, 5 ng/ml; hIL-2, 100 U/ml) for 48 h, and upon addition of Actinomycin D, FoxP3 mRNA levels were analyzed by qPCR at different time points (n=3, for each genotype T cells from 3 mice were pooled before stimulation). FoxP3 mRNA levels are shown relative to SDHA levels.

Data in A and B are representative of two experiments.

**Figure S8. Detection of adoptively transferred Treg cells in the hosts.**

- A Analysis of the percentage of total CD25<sup>+</sup> FoxP3<sup>+</sup> cells amongst CD4<sup>+</sup> T cells isolated from lymph nodes and spleens of mice of the indicated genotypes, with or without adoptive Treg cell transfer.
- B Flow cytometric analysis (upper panel) and quantification (lower panel) of the presence of adoptively transferred GFP<sup>+</sup> Treg cells amongst total Treg cells in mice of the indicated genotypes.

Data in A and B are representative of two experiments (n=3, analyzed 4.5 weeks after transfer).
