# Supplementary material
Source: PubMed Central journal article supplement (PMC4282555)

**A**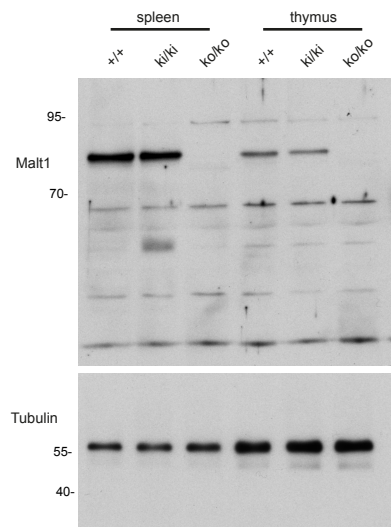**B**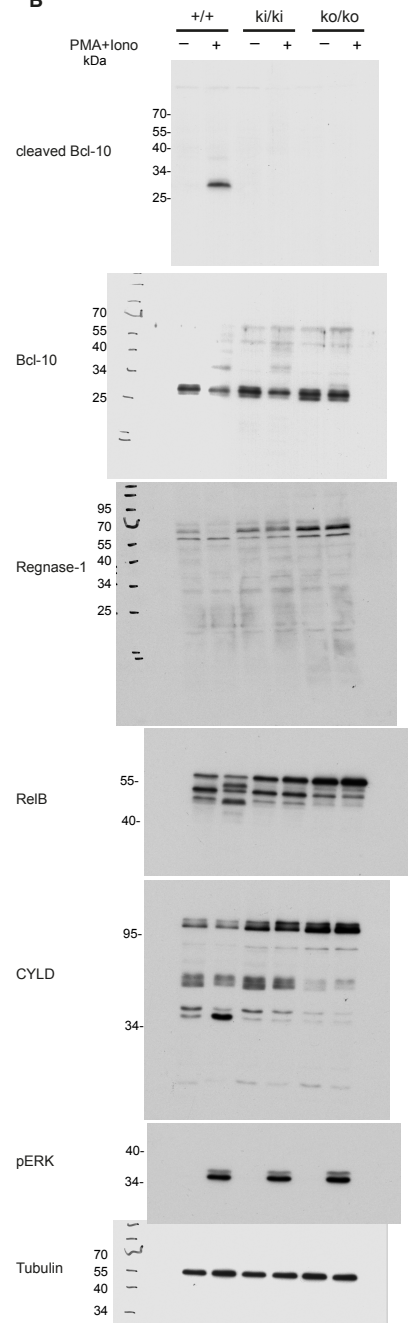**C**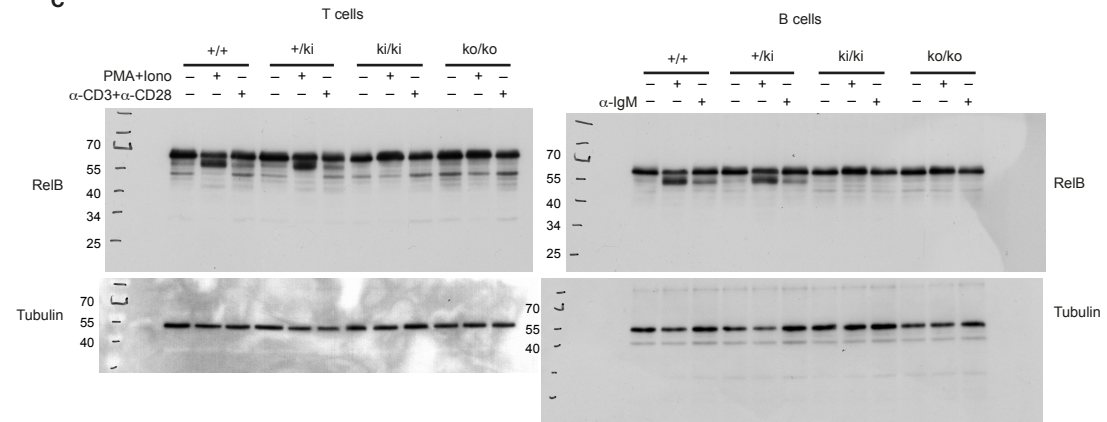**D**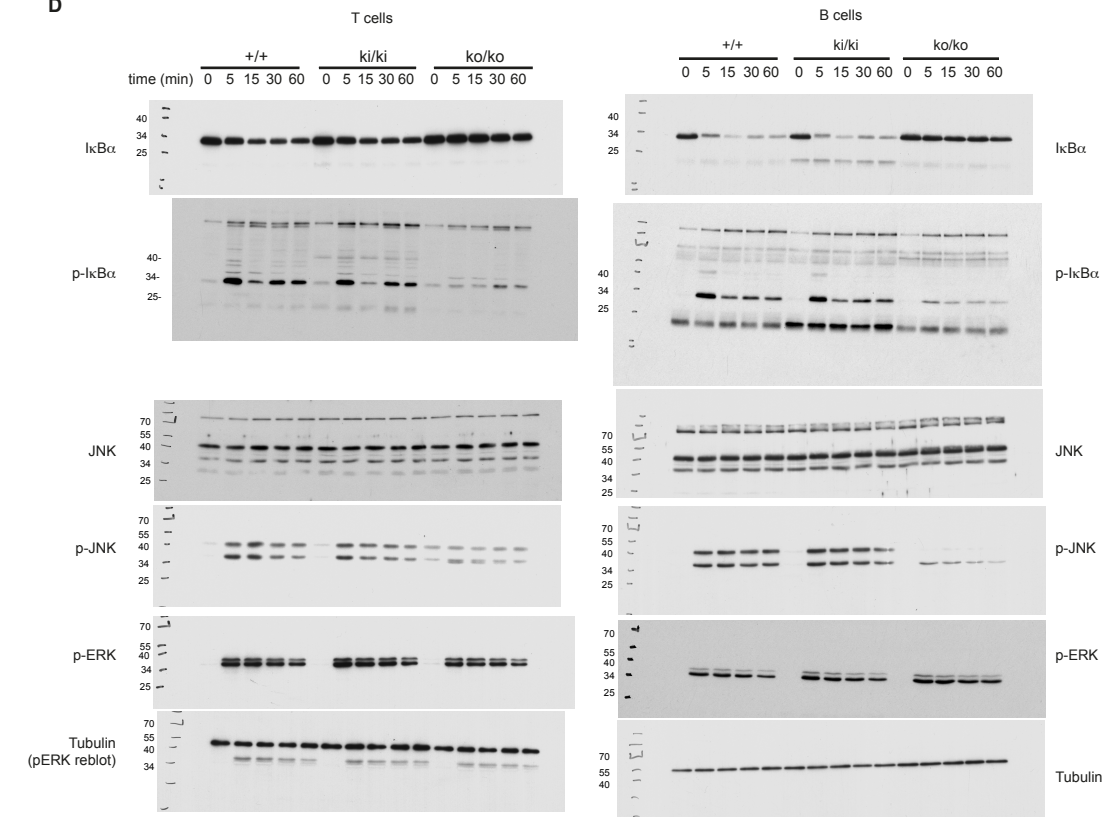

Supplement: embj0033-2765-sd3.pdf [file embj0033-2765-sd3.pdf]

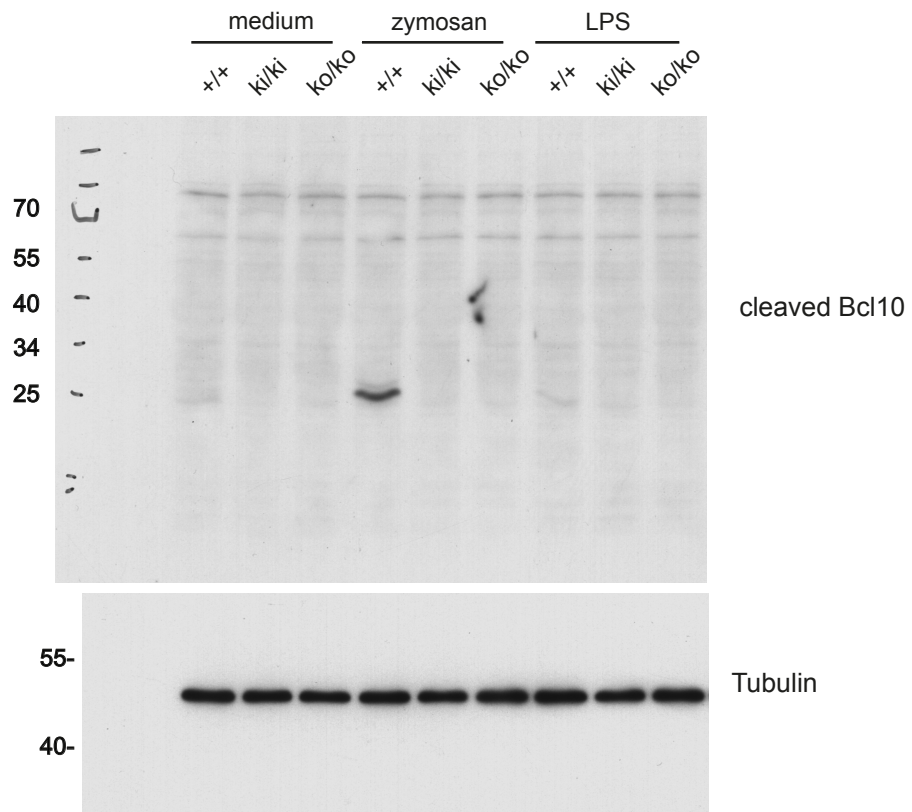

Jaworski et al., Source data to Figure 3

Supplement: embj0033-2765-sd4.pdf [file embj0033-2765-sd4.pdf]

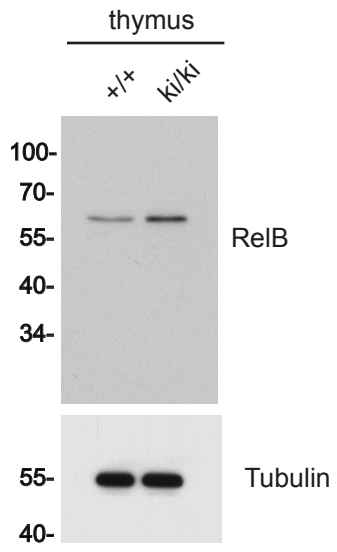

Jaworski et al., Source data to Figure 7

Supplement: embj0033-2765-sd5.pdf [file embj0033-2765-sd5.pdf]
